# Supplementary material for: Gossypol Acetic Acid Attenuates Cardiac Ischemia/Reperfusion Injury in Rats via an Antiferroptotic Mechanism
Source: MDPI journal article supplement (doi:10.3390/biom11111667), 2021-11-10
Supplement: s1 [file s1]

## Supplement S1

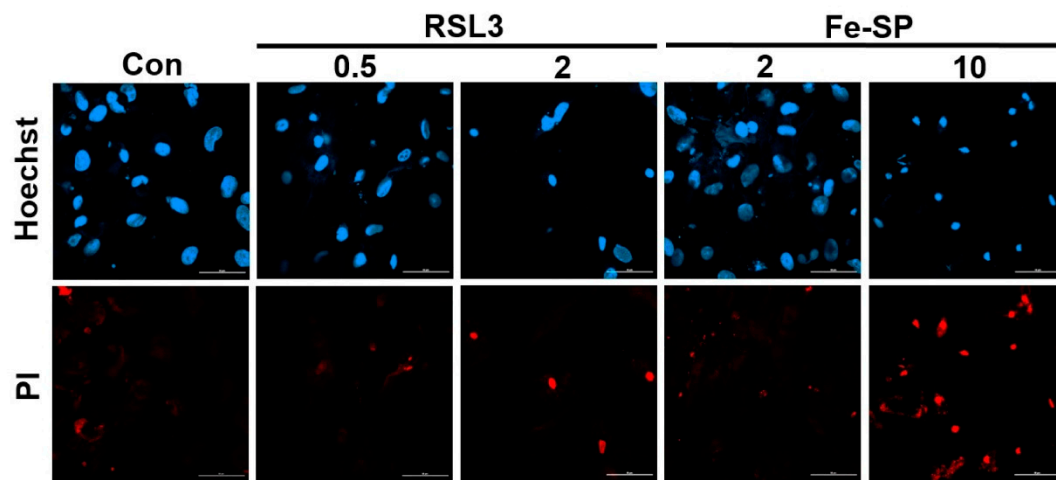

**Figure S1.** Treatment with RSL3 and Fe-SP in neonatal rat cardiomyocyte for 24 h, and examined through confocal microscopy using Hoechst 33342 and PI stainings. The results showed that RSL3 (2  $\mu$ M) and Fe-SP (10  $\mu$ M) treatments increased the number of PI positive cells, but not at low concentrations of RSL3 (0.5  $\mu$ M) and Fe-SP (2  $\mu$ M) in neonatal rat cardiomyocytes.
